# Supplementary material
Source: PubMed Central journal article supplement (PMC10282458)
Supplement: S136898001300133Xsup001.pdf [file S136898001300133Xsup001.pdf]

**Supplemental Table 1** Mean annual change in indicators of adiposity among Colombian school children according to frequency of intake of common snack foods<sup>a</sup>

|                                | N   | Change in BMI (kg/m <sup>2</sup> /y) |               | Change in skinfold thickness ratio (/y) |                 | Change in waist circumference (cm/y) |             |
|--------------------------------|-----|--------------------------------------|---------------|-----------------------------------------|-----------------|--------------------------------------|-------------|
|                                |     | Difference                           | 95% CI        | Difference                              | 95% CI          | Difference                           | 95% CI      |
| <b>Chocolate bar</b>           |     |                                      |               |                                         |                 |                                      |             |
| Never                          | 48  | Reference                            |               | Reference                               |                 | Reference                            |             |
| <1/month                       | 80  | 0.03                                 | (-0.19, 0.24) | -0.020                                  | (-0.041, 0.000) | -0.4                                 | (-1.4, 0.6) |
| 1/week to 1/month              | 309 | -0.03                                | (-0.26, 0.11) | 0.000                                   | (-0.022, 0.016) | 0.0                                  | (-0.7, 0.8) |
| 2 to 6/week                    | 269 | -0.07                                | (-0.26, 0.11) | -0.015                                  | (-0.034, 0.004) | -0.3                                 | (-1.0, 0.5) |
| ≥1/day                         | 234 | 0.04                                 | (-0.15, 0.23) | 0.000                                   | (-0.019, 0.019) | -0.3                                 | (-1.1, 0.5) |
| p, trend <sup>b</sup>          |     | 0.77                                 |               | 0.45                                    |                 | 0.37                                 |             |
| <b>Ice cream/popsicle</b>      |     |                                      |               |                                         |                 |                                      |             |
| Never                          | 42  | Reference                            |               | Reference                               |                 | Reference                            |             |
| <1/month                       | 143 | 0.05                                 | (-0.17, 0.27) | -0.007                                  | (-0.025, 0.010) | 0.5                                  | (-0.5, 1.5) |
| 1/week to 1/month              | 552 | 0.05                                 | (-0.15, 0.25) | 0.001                                   | (-0.015, 0.016) | 0.6                                  | (-0.3, 1.5) |
| 2 to 6/week                    | 133 | 0.06                                 | (-0.16, 0.28) | 0.006                                   | (-0.012, 0.024) | 0.3                                  | (-0.7, 1.4) |
| ≥1/day                         | 65  | 0.09                                 | (-0.16, 0.34) | 0.011                                   | (-0.010, 0.032) | -0.3                                 | (-1.4, 0.9) |
| p, trend <sup>b</sup>          |     | 0.52                                 |               | 0.06                                    |                 | 0.36                                 |             |
| <b>Guava/coconut candy bar</b> |     |                                      |               |                                         |                 |                                      |             |
| Never                          | 143 | Reference                            |               | Reference                               |                 | Reference                            |             |
| <1/month                       | 151 | 0.08                                 | (-0.06, 0.22) | -0.009                                  | (-0.024, 0.054) | -0.2                                 | (-0.9, 0.4) |
| 1/week to 1/month              | 339 | -0.03                                | (-0.15, 0.09) | -0.002                                  | (-0.015, 0.010) | -0.1                                 | (-0.7, 0.4) |
| 2 to 6/week                    | 198 | -0.08                                | (-0.20, 0.04) | -0.007                                  | (-0.021, 0.007) | -0.2                                 | (-0.8, 0.5) |
| ≥1/day                         | 109 | -0.03                                | (-0.18, 0.13) | -0.005                                  | (-0.021, 0.010) | -0.5                                 | (-1.2, 0.3) |
| p, trend <sup>b</sup>          |     | 0.12                                 |               | 0.58                                    |                 | 0.35                                 |             |
| <b>Candy/lollipop</b>          |     |                                      |               |                                         |                 |                                      |             |
| Never                          | 62  | Reference                            |               | Reference                               |                 | Reference                            |             |
| <1/month                       | 98  | 0.11                                 | (-0.07, 0.28) | 0.001                                   | (-0.019, 0.020) | 0.4                                  | (-0.4, 1.2) |
| 1/week to 1/month              | 293 | 0.05                                 | (-0.11, 0.21) | 0.003                                   | (-0.013, 0.019) | 0.2                                  | (-0.5, 0.8) |
| 2 to 6/week                    | 237 | 0.05                                 | (-0.11, 0.21) | -0.002                                  | (-0.018, 0.015) | -0.3                                 | (-0.9, 0.4) |
| ≥1/day                         | 247 | 0.13                                 | (-0.04, 0.30) | 0.009                                   | (-0.007, 0.025) | 0.2                                  | (-0.5, 0.8) |
| p, trend <sup>b</sup>          |     | 0.23                                 |               | 0.25                                    |                 | 0.55                                 |             |
| <b>Packed fried snacks</b>     |     |                                      |               |                                         |                 |                                      |             |
| Never                          | 103 | Reference                            |               | Reference                               |                 | Reference                            |             |
| <1/month                       | 135 | 0.11                                 | (-0.04, 0.27) | 0.005                                   | (-0.012, 0.022) | 0.3                                  | (-0.5, 1.0) |
| 1/week to 1/month              | 310 | 0.03                                 | (-0.10, 0.16) | 0.005                                   | (-0.009, 0.019) | 0.1                                  | (-0.5, 0.8) |
| 2 to 6/week                    | 207 | 0.09                                 | (-0.05, 0.23) | 0.003                                   | (-0.013, 0.018) | 0.3                                  | (-0.4, 0.9) |
| ≥1/day                         | 191 | 0.06                                 | (-0.08, 0.21) | 0.008                                   | (-0.006, 0.022) | 0.3                                  | (-0.4, 0.9) |
| p, trend <sup>b</sup>          |     | 0.56                                 |               | 0.41                                    |                 | 0.43                                 |             |
| <b>Fruit punches</b>           |     |                                      |               |                                         |                 |                                      |             |
| Never                          | 155 | Reference                            |               | Reference                               |                 | Reference                            |             |
| <1/month                       | 109 | -0.03                                | (-0.16, 0.10) | -0.009                                  | (-0.025, 0.007) | 0.2                                  | (-0.6, 1.0) |
| 1/week to 1/month              | 239 | 0.10                                 | (-0.01, 0.21) | -0.060                                  | (-0.019, 0.007) | 0.2                                  | (-0.4, 0.8) |

|                       |     |       |               |        |                 |      |             |
|-----------------------|-----|-------|---------------|--------|-----------------|------|-------------|
| 2 to 6/week           | 224 | 0.04  | (-0.07, 0.15) | -0.011 | (-0.024, 0.001) | -0.2 | (-0.7, 0.3) |
| ≥1/day                | 206 | -0.01 | (-0.13, 0.10) | -0.006 | (-0.019, 0.006) | 0.1  | (-0.5, 0.7) |
| p, trend <sup>b</sup> |     | 0.96  |               | 0.27   |                 | 0.71 |             |

BMI, Body Mass Index; CI, Confidence Interval.

<sup>a</sup> Differences in change and 95% CI are from mixed-effects linear regression models with the adiposity measure as the outcome and predictors that included indicator variables for frequency of intake of each food item, age in decimal years, and their interaction terms. Random effects were included for intercepts and slopes. Models for waist circumference included random effects for intercepts only. An unstructured variance-covariance matrix was specified. All models were adjusted for child's sex, total energy intake, and socioeconomic status.

<sup>b</sup> For a variable that represented frequency of intake categories, introduced in the linear regression model as a continuous predictor (Wald test).
